# Supplementary material for: Selective Colorimetric Detection of Pb(II) Ions by Using Green Synthesized Gold Nanoparticles with Orange Peel Extract
Source: MDPI journal article supplement (doi:10.3390/chemosensors12030033), 2024-02-24
Supplement: s1 [file s1]

# Selective Colorimetric Detection of Pb(II) Ions by Using Green Synthesized Gold Nanoparticles with Orange Peel Extract

Marco Zannotti, Sara Piras, Lorenzo Remia, Diego Appignanesi and Rita Giovannetti\*

Chemistry Interdisciplinary Project (ChIP), School of Science and Technology, Chemistry Division,  
University of Camerino, 62032 Camerino, Italy

\* Correspondence: rita.giovannetti@unicam.it (R.G); marco.zannotti@unicam.it (M.Z.)

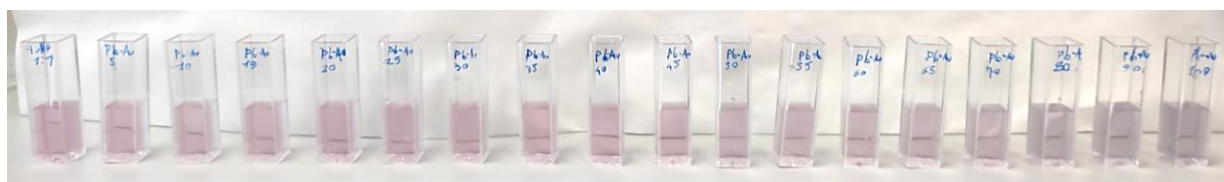

**Figure S1.** Sample image of AuNPs@OPE with increasing concentration of Pb<sup>2+</sup> ions up to 58 μM.

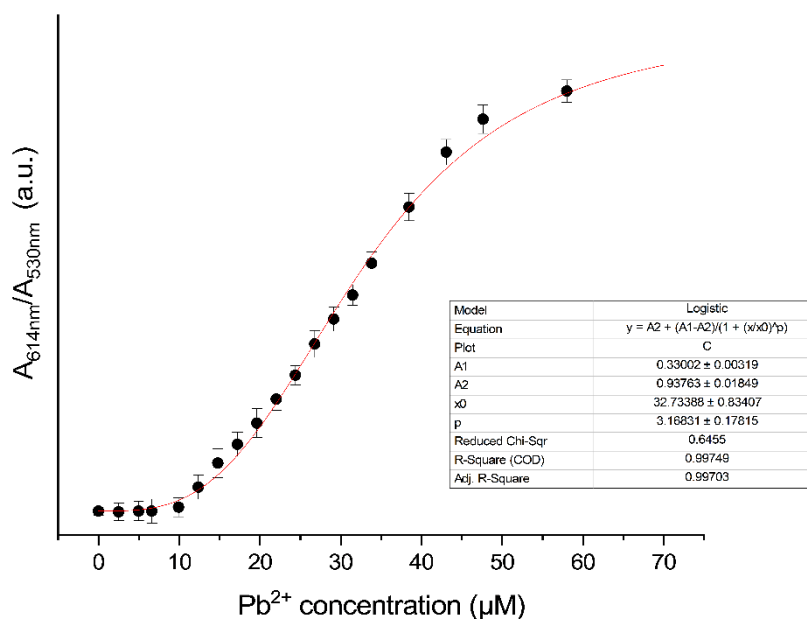

**Figure S2.** Fitting of the sigmoidal curve by logistic equation.

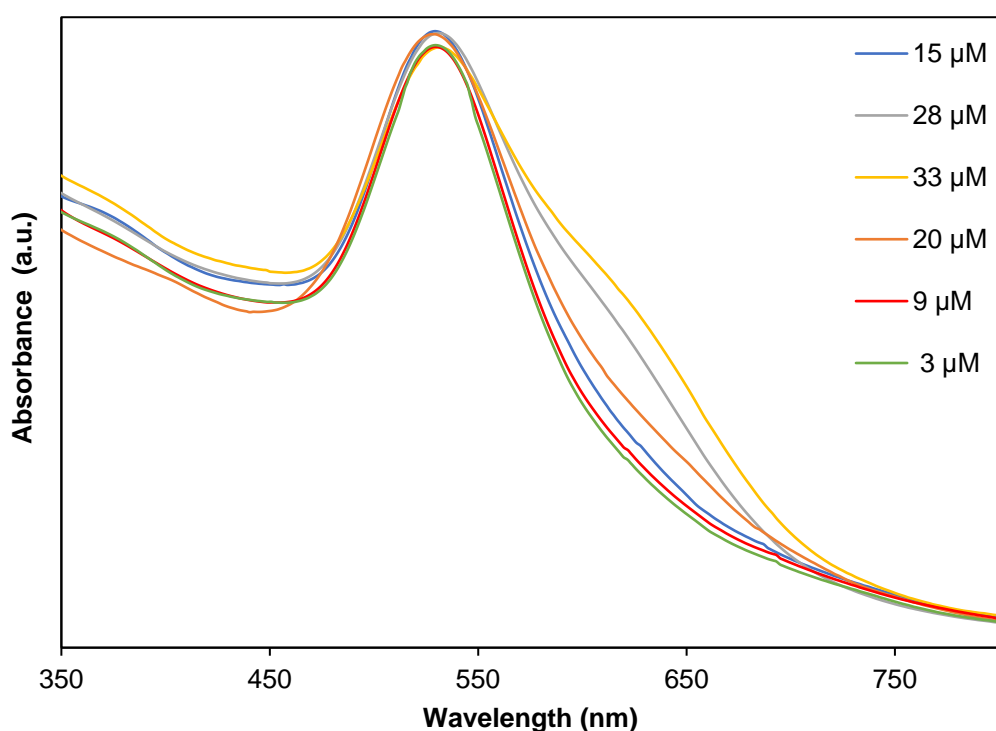

**Figure S3** UV-Vis spectra of AuNPs@OPE with different spiked concentrations of  $\text{Pb}^{2+}$  using drinking water samples.

**Table S1** Cations, anions and pH of the drinking waters used for the colorimetric assay of  $\text{Pb}^{2+}$  using AuNPs@OPE

| Cations by<br>ICP-MS                          | Sample 1<br>(mg/L) | Sample 2<br>(mg/L) |
|-----------------------------------------------|--------------------|--------------------|
| Li                                            | 0.041              | 0.022              |
| Na                                            | 64.628             | 4.912              |
| K                                             | 35.210             | 1.202              |
| Ca                                            | 189.530            | 85.614             |
| Mg                                            | 21.740             | 5.452              |
| Sr                                            | 1.110              | 0.128              |
| Fe                                            | 0.56               | 0.007              |
| Al                                            | 0.035              | 0.002              |
| Ba                                            | 0.080              | 0.01               |
| Mn                                            | 0.005              | 0.5                |
| <b>Anions by<br/>Ionic<br/>chromatography</b> |                    |                    |
| $\text{F}^-$                                  | 1.318              | 5.002              |
| $\text{Cl}^-$                                 | 38.665             | 6.202              |
| $\text{HCO}_3^-$                              | 731.00             | 220.126            |
| $\text{SO}_4^{2-}$                            | 60.874             | 3.612              |
| $\text{NO}_3^-$                               | 20.085             | 45.021             |
| pH                                            | 6.52               | 7.31               |
